# Supplementary material for: Development and Technical Validation of an Immunoassay for the Detection of APP669–711 (Aβ−3–40) in Biological Samples
Source: MDPI journal article supplement (doi:10.3390/ijms21186564), 2020-09-08
Supplement: s1 [file s1]

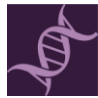

## Supplementary Figure S1. Monoclonal antibody (mAb) 14-2-4 shows excellent selectivity for $A\beta_{3-40}$ on Capillary Isoelectric Focusing Immunoassay

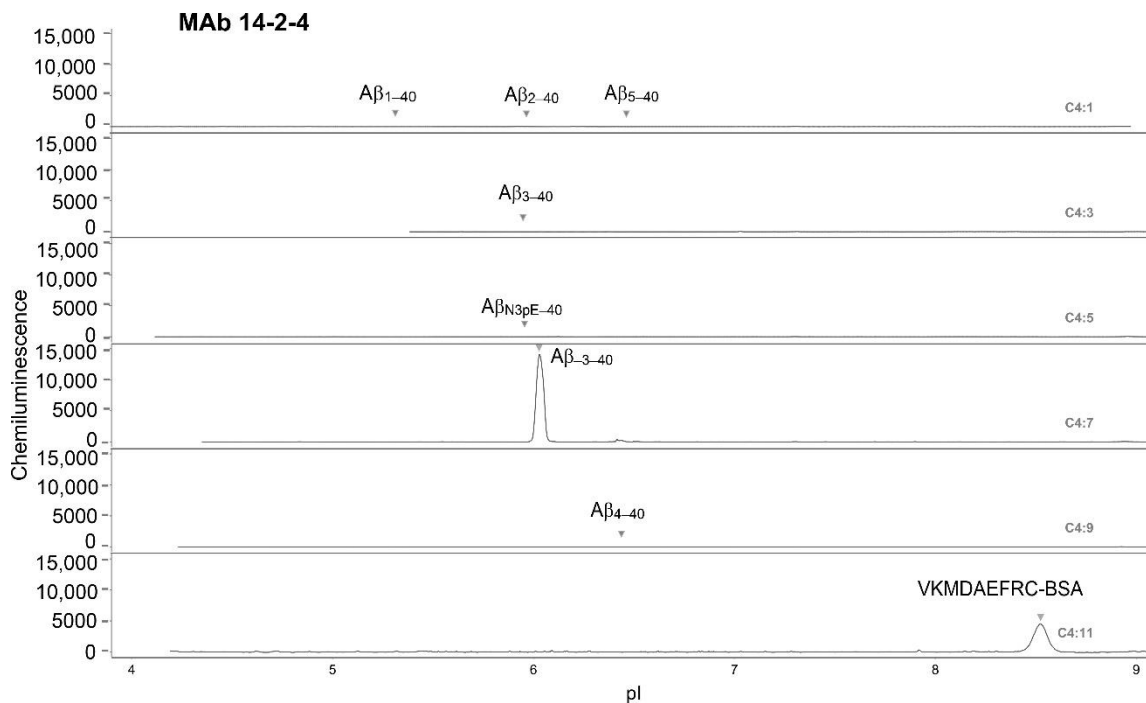

**Figure S1.** Monoclonal antibody 14-2-4 recognizes  $A\beta_{3-40}$  with high selectivity on capillary isoelectric focusing immunoassay. A series of synthetic  $A\beta$  peptides with different N-termini was separated by isoelectric focusing in microcapillaries, immobilized by a photochemical reaction and probed with mAb 14-2-4 (2  $\mu\text{g}/\text{mL}$ ). Chemiluminescent detection was achieved with biotinylated goat-anti mouse IgG antibody in combination with streptavidin-peroxidase and chemiluminescent substrate. The specific  $A\beta$ -variants loaded in the different capillaries as single peptides or in mixtures are indicated.  $A\beta_{1-40}$ ,  $A\beta_{2-40}$ ,  $A\beta_{3-40}$ ,  $A\beta_{4-40}$ ,  $A\beta_{5-40}$  and  $A\beta_{3-40}$  were loaded at a concentration of 100 ng/mL. The tested concentration of  $A\beta_{N3pE-40}$  and VKMDAEFRC-BSA was 200 ng/mL.



## Supplementary Figure S2. MAb 14-2-4 shows high selectivity for A $\beta$ -<sub>3-40</sub> on Western blot analysis

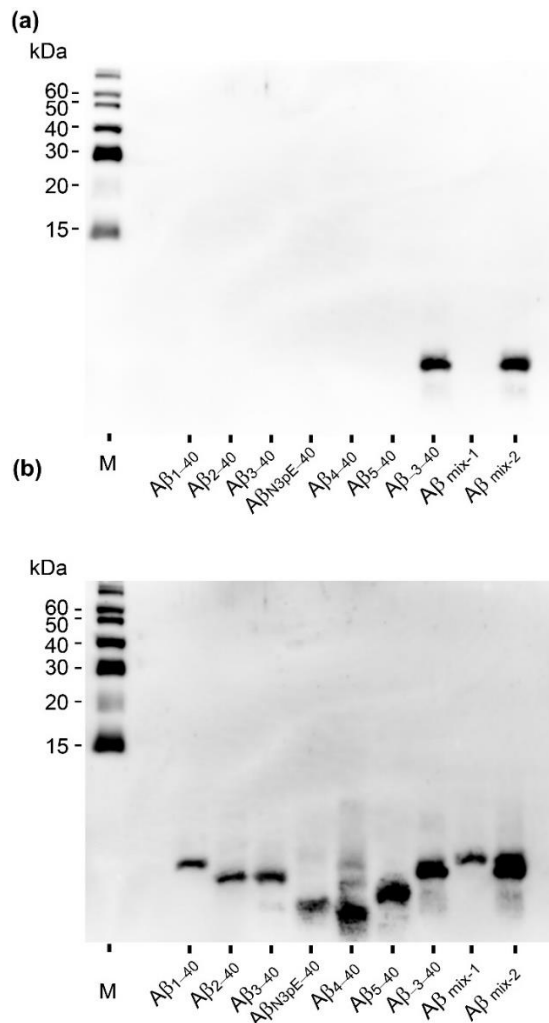

**Figure S2.** MAb14-2-4 shows high selectivity for A $\beta$ -<sub>3-40</sub> on Western blot analysis. The indicated synthetic A $\beta$  peptides with different N-termini were separated on a 12% T / 5% C Urea-SDS-polycrylamide gel, blotted onto PVDF and probed with (a) mAb 14-2-4 (1  $\mu$ g/mL) in combination with goat anti-mouse IgG-peroxidase conjugate (1:30000 dilution in PBS-T). 25 ng of A $\beta$ <sub>4-40</sub> and A $\beta$ <sub>5-40</sub> and 10 ng of the remaining peptides were loaded. M) Protein Ladder; A $\beta$  mix-1) mixture containing 10ng, each, of A $\beta$ <sub>1-37</sub>, A $\beta$ <sub>1-38</sub>, A $\beta$ <sub>1-39</sub>, A $\beta$ <sub>1-40</sub>, A $\beta$ <sub>1-42</sub>; A $\beta$  mix-2) mixture containing 10ng each of A $\beta$ <sub>1-37</sub>, A $\beta$ <sub>1-38</sub>, A $\beta$ <sub>1-39</sub>, A $\beta$ <sub>1-40</sub>, A $\beta$ <sub>1-42</sub> and A $\beta$ -<sub>3-40</sub>. The image was recorded after 5 min exposure. Image display: High: 65535; Low: 0; Gamma: 0.6. (b) Reprobing of the same PVDF membrane without stripping with mAb5C3 (anti A $\beta$ <sub>40</sub>) (1  $\mu$ g/mL) in combination with goat anti-mouse IgG-peroxidase conjugate (1:30000 dilution in PBS-T). Image recorded after 3 min exposure. Image display: High: 65535; Low: 213; Gamma 1.0.



### Supplementary Figure S3. MAb 101-1-1 immunoprecipitates secreted APP $\alpha$ from conditioned cell culture media

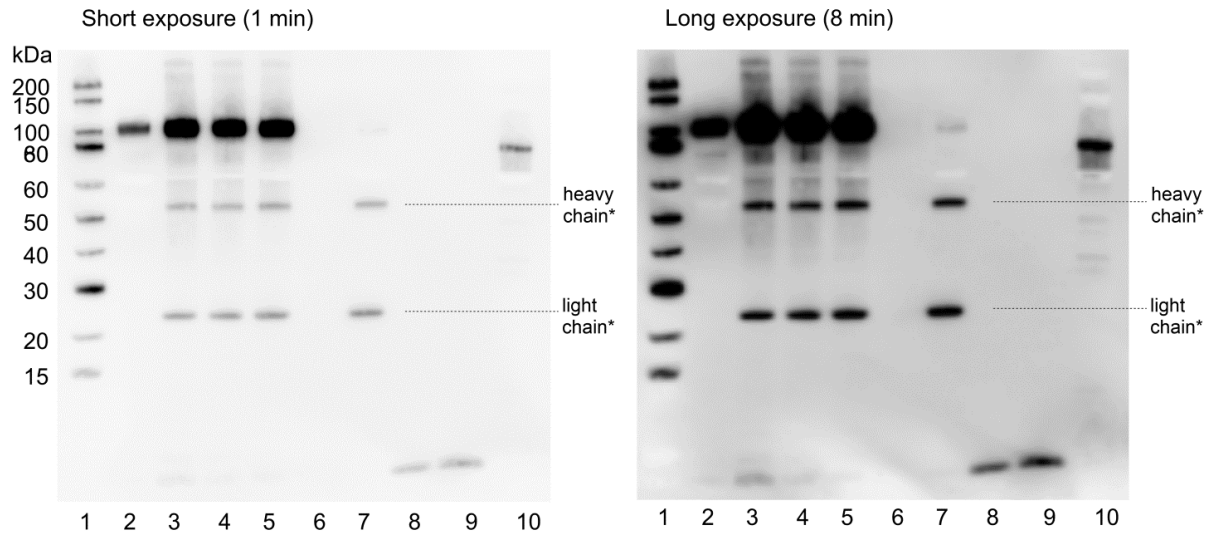

**Figure S3.** Immunoprecipitation of secreted APP with mAb 101-1-1 from cell culture supernatants. Dynabeads M270 Epoxy were functionalized with mAb 101-1-1 and mixed with aliquots of H4APP751wt cell culture supernatants for overnight immunoprecipitation. The resulting magnetic bead immune complexes were eluted by heating for 10 min at 70°C in LDS-sample buffer (without reducing agent). After addition of 1 mM DTT, the samples were analyzed by SDS-PAGE followed by Western blotting and immunostaining with anti A $\beta$  mAb1E8. Two different exposures (1 min and 8 min) of the same blot membrane are shown. 1) protein ladder; 2) 1  $\mu$ L of cell culture supernatant H4APP751wt; 3) 101-1-1-M270 magnetic bead IP from 400  $\mu$ L of conditioned medium; 4) 101-1-1-M270 magnetic bead IP from 200  $\mu$ L of conditioned medium; 5) 101-1-1-M270 magnetic bead IP from 100  $\mu$ L of conditioned medium; 6) LDS sample buffer; 7) 101-1-1-M270 magnetic bead control IP from 100 pg/mL of synthetic A $\beta$ <sub>3-40</sub> in Diluent-35; 8) 100 pg of A $\beta$ <sub>3-40</sub>; 9) 100 pg of A $\beta$ <sub>1-40</sub>; 10) 1 ng of recombinant sAPP $\alpha$  (stock solution prepared in Diluent-35). Image display: Min: 0, Max: 65535, Gamma: 0.65.

\*Tentative assignment: Protein bands of approx. 25 and 55 kDa detected in IP-eluates presumably represent heavy and light-chains of mAb 101-1-1 eluted from the magnetic beads.



### Supplementary Figure S4. Schematic representation of the assay principle

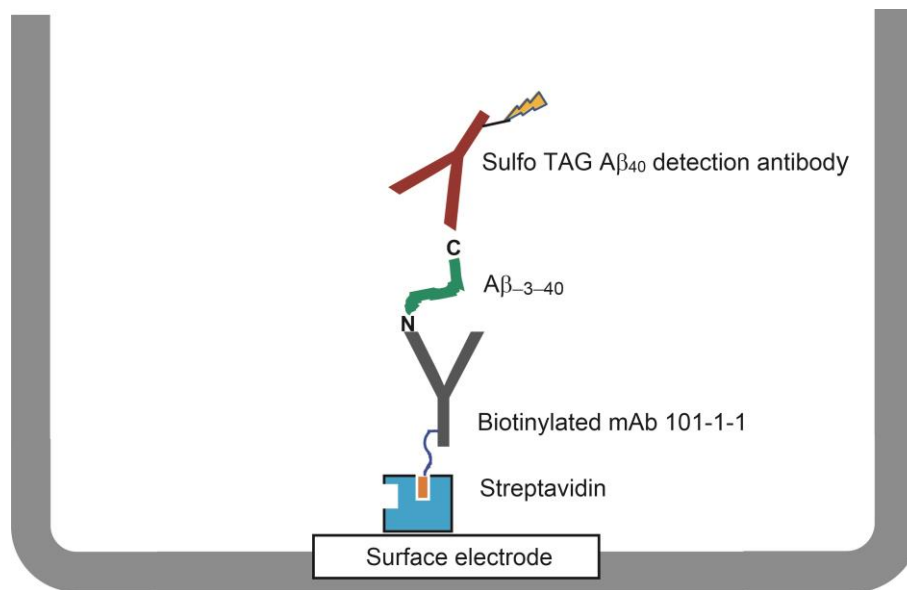

**Figure S4.** Assay principle. A small spot streptavidin assay plate (MSD) is coated with the biotinylated mAb101-1-1 capture antibody. During the subsequent incubation with the sample,  $A\beta_{3-x}$  is bound to the immobilized mAb101-1-1 via its amino-terminus. For detection, SULFO-TAG labeled anti  $A\beta_{40}$  is added, which recognizes selectively the C-terminus of the captured  $A\beta_{3-40}$  peptides. The electro-chemiluminescent signal (light) is generated upon electric stimulation in the presence of read buffer and recorded on the MSD Quickplex SQ120 reader. The graphical representation contains information from the Mesoscale Discovery Web site ([https://www.mesoscale.com/en/technical\\_resources](https://www.mesoscale.com/en/technical_resources), accessed 2020-07-16. 01:45 p.m.).

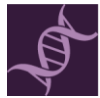

**Supplementary Figure S5. No evidence of systematic positional effects (spatial bias) observed**

**Plate 1**

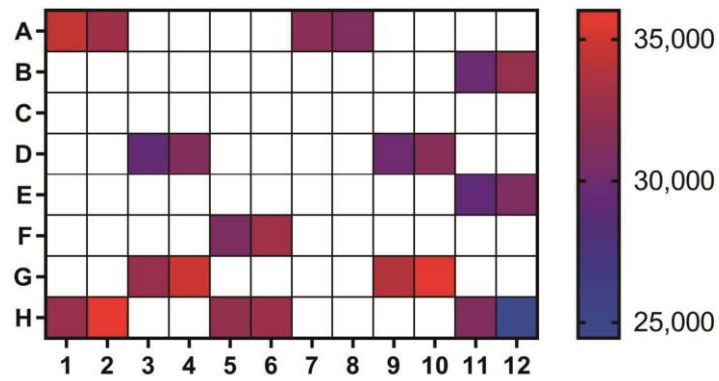

**Plate 2**

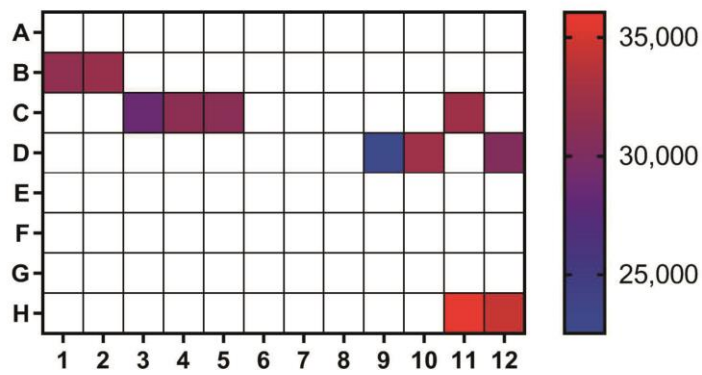

**Figure S5.** Spatial distribution of signals obtained with technical replicates of a control sample on two different assay plates.

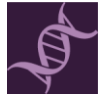

### Supplementary Figure S6. Impact of pre-analytical freezing and thawing on the measurements of $A\beta_{38}$ , $A\beta_{40}$ , $A\beta_{42}$ and the $A\beta_{42}/A\beta_{40}$ ratio

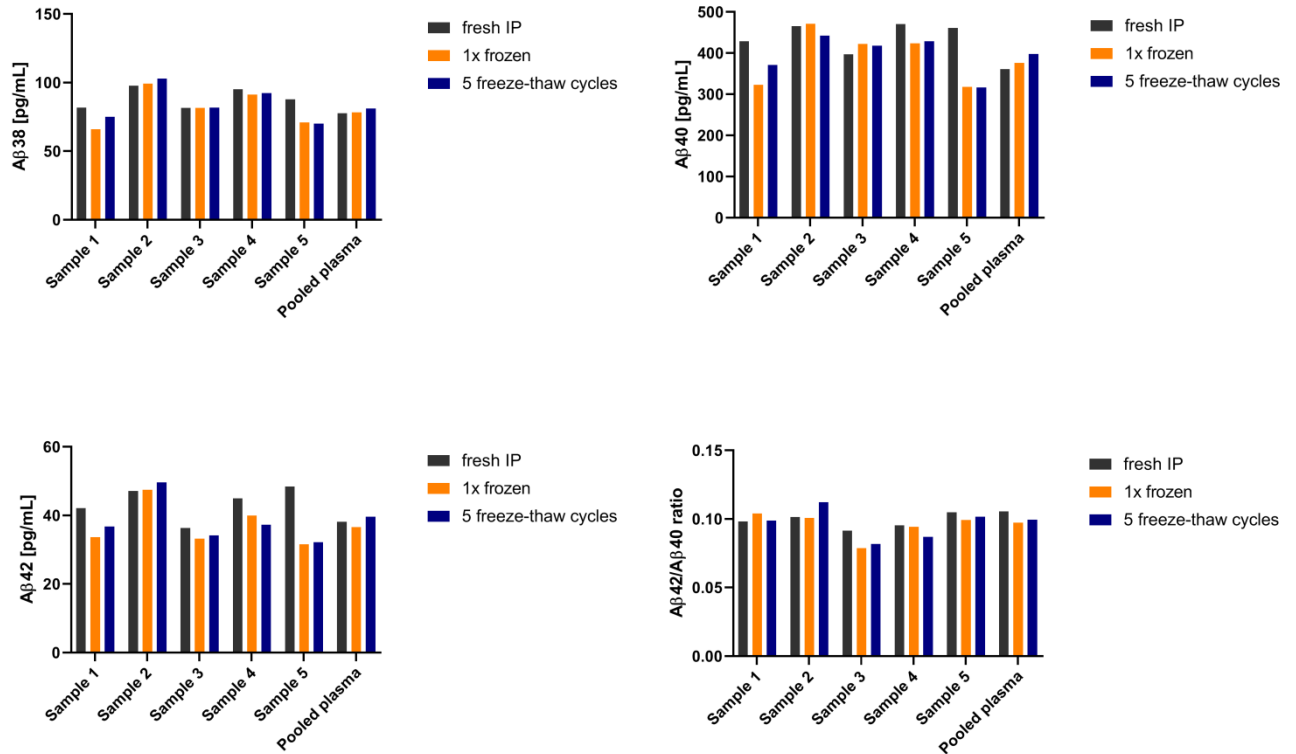

**Figure S6.** Impact of pre-analytical freezing and thawing on the measurements of  $A\beta_{38}$ ,  $A\beta_{40}$ ,  $A\beta_{42}$  and the  $A\beta_{42}/A\beta_{40}$  ratio. IP-eluates obtained by 1E8 magnetic bead IP from aliquots of 5 individual and 1 pooled plasma sample were diluted with Diluent-35 and measured in the V-Plex  $A\beta$  panel 1 (6E10) multiplex assay kit (Mesoscale Discovery, MSD) assay, either freshly or after 1 or 5 freeze-thaw cycles. Mean calculated concentrations from 2 technical replicates on the assay plate are shown. The observations do not suggest a general and systematic influence of single or multiple freeze-thaw cycles on the measurement of the tested  $A\beta$  variants or the  $A\beta_{42}/A\beta_{40}$  ratio in diluted IP-eluates.



### Supplementary Table S1. Intra-assay reproducibility of the A $\beta$ -3-40 assay

**Table S1.** Intra-Assay Reproducibility \*.

| Sample                     | Sample 1 | Sample 2 | Sample 3 |
|----------------------------|----------|----------|----------|
| mean concentration (pg/mL) | 219.93   | 242.39   | 224.48   |
| SD                         | 4.78     | 6.64     | 4.41     |
| % CV                       | 2.17     | 2.74     | 1.96     |
| min                        | 212.31   | 231.00   | 218.76   |
| max                        | 224.85   | 253.14   | 231.61   |
| n                          | 8        | 8        | 8        |

\*Diluted IP eluates obtained from 3 different original EDTA plasma samples were measured on the same assay plate in 8 technical replicates, each.

### Supplementary Table S2. Day-to-day variance of the manual immunoprecipitation procedure

**Table S2.** Day-to-day variance of the manual magnetic bead IP \*.

| .                      | Sample A | Sample B | Sample C | Sample D | Sample E |
|------------------------|----------|----------|----------|----------|----------|
| Day 1                  | 250.13   | 218.87   | 219.83   | 210.36   | 239.51   |
| Day 2                  | 231.29   | 193.37   | 231.34   | 210.54   | 266.55   |
| Day 3                  | 196.59   | 215.44   | 203.51   | 197.13   | 165.53   |
| Day 4                  | 212.30   | 199.78   | 216.56   | 214.06   | 202.56   |
| mean                   | 222.58   | 206.87   | 217.81   | 208.02   | 218.54   |
| SD                     | 23.21    | 12.25    | 11.45    | 7.46     | 44.01    |
| CV (%)                 | 10.43    | 5.92     | 5.25     | 3.59     | 20.14    |
| Overall mean % CV: 9.1 |          |          |          |          |          |

\* On 4 different days, manual immunoprecipitations were executed from aliquots of 5 different original EDTA plasma samples (A-E). IP eluates were diluted 4.8 fold with diluent-35 and stored frozen at -80 °C. After thawing, the A $\beta$ -3-40 concentrations were measured on a single assay plate. Unless otherwise stated, the measured concentrations (pg/mL) are indicated.



### Supplementary Table S3. Baseline statistics of the measured blood A $\beta$ levels and A $\beta$ ratios in the clinical samp

**Table S3.** Baseline statistics of the measured A $\beta$ -3-40, A $\beta$ 40 and A $\beta$ 42 concentrations in the diluted IP-eluates and the concentrations ratios A $\beta$ 42/A $\beta$ 40 and A $\beta$ 42/A $\beta$ -3-40.

|                                          | A $\beta$ -30-40<br>(pg/mL) | A $\beta$ 40<br>(pg/mL) | A $\beta$ 42 (pg/mL) | A $\beta$ 42/A $\beta$ 40 | A $\beta$ 42/A $\beta$ -30-40 |
|------------------------------------------|-----------------------------|-------------------------|----------------------|---------------------------|-------------------------------|
| n                                        | 40                          | 40                      | 404                  | 40                        | 40                            |
| min                                      | 49.46                       | 73.08                   | 8.65                 | 0.095                     | 0.131                         |
| 25% precentile                           | 56.74                       | 93.58                   | 10.53                | 0.105                     | 0.159                         |
| Median                                   | 65.82                       | 102.2                   | 11.8                 | 0.113                     | 0.174                         |
| 75% precentile                           | 74.13                       | 113.7                   | 13.42                | 0.1238                    | 0.201                         |
| Max                                      | 109.9                       | 155.8                   | 17.05                | 0.148                     | 0.256                         |
| range                                    | 60.42                       | 82.76                   | 8.4                  | 0.053                     | 0.125                         |
| mean                                     | 67.14                       | 104.7                   | 11.92                | 0.1147                    | 0.1806                        |
| SD                                       | 13.11                       | 18                      | 1.959                | 0.012                     | 0.029                         |
| SEM                                      | 2.073                       | 2.847                   | 0.310                | 0.002                     | 0.005                         |
| <i>p</i> value<br>normality test *       | 0.00752                     | 0.3287                  | 0.3163               | 0.1501                    | 0.0672                        |
| <i>p</i> value<br>lognormality<br>test * | 0.1518                      | 0.9084                  | 0.8412               | 0.5144                    | 0.4789                        |

\* Shapiro-wilk test (alpha = 0.05).

### Supplementary Table S4. Shapiro-Wilk tests for normal and lognormal data distribution in the diagnostic groups

**Table S4.** Shapiro-wilk test for normal and lognormal data distribution in the diagnostic groups.

|                              | <i>p</i> value normality test *    |        |
|------------------------------|------------------------------------|--------|
|                              | OD                                 | AD-D   |
| A $\beta$ -3-40              | 0.0768                             | 0.0331 |
| A $\beta$ 40                 | 0.7586                             | 0.5595 |
| A $\beta$ 42                 | 0.3655                             | 0.0737 |
| A $\beta$ 42/A $\beta$ -3-40 | 0.9876                             | 0.0257 |
| A $\beta$ 42/A $\beta$ 40    | 0.7939                             | 0.832  |
|                              | <i>p</i> value lognormality test * |        |
|                              | OD                                 | AD-D   |
| A $\beta$ -3-40              | 0.1515                             | 0.5001 |
| A $\beta$ 40                 | 0.9445                             | 0.8875 |
| A $\beta$ 42                 | 0.3222                             | 0.4832 |
| A $\beta$ 42/A $\beta$ -3-40 | 0.8581                             | 0.8974 |
| A $\beta$ 42/A $\beta$ 40    | 0.8925                             | 0.143  |

\* Shapiro-wilk test (alpha = 0.05).
